# Supplementary material
Source: PubMed Central journal article supplement (PMC5785489)

## **FIGURE LEGENDS**

### **Figure 1. Schematic Representation of the Modeling Process.**

Abbreviations: CI = confidence interval; HR = hazard ratio; SL<sub>enter</sub> = significance level for entry in the model; SL<sub>stay</sub> = significance level for retention in the model.

**Figure 2. Kaplan–Meier Curves for rPFS by Risk Group (a) and Relative Hazard Ratio by Risk Group (b), as Estimated by the Stepwise Final Model for Patients Treated With Abiraterone Plus Prednisone.** Abbreviations: CI = confidence interval; HR = hazard ratio; rPFS = radiographic progression-free survival.

<sup>a</sup>Versus patients with good prognosis.

## **SUPPLEMENTARY FIGURES**

### **Supplementary Figure 1. Results From the Best Subset Selection.**

### **Supplementary Figure 2. Frequency of Factors Selected in the Bootstrap Samples.**

For each model, 500 samples were analyzed. Bootstrap validation for the model is presented. Factors shaded in green were included in the final model. Abbreviations: ALP = alkaline phosphatase; BPI = Brief Pain Inventory; LDH = lactate dehydrogenase; LLN = lower limit of normal; PSA = prostate-specific antigen; ULN = upper limit of normal.

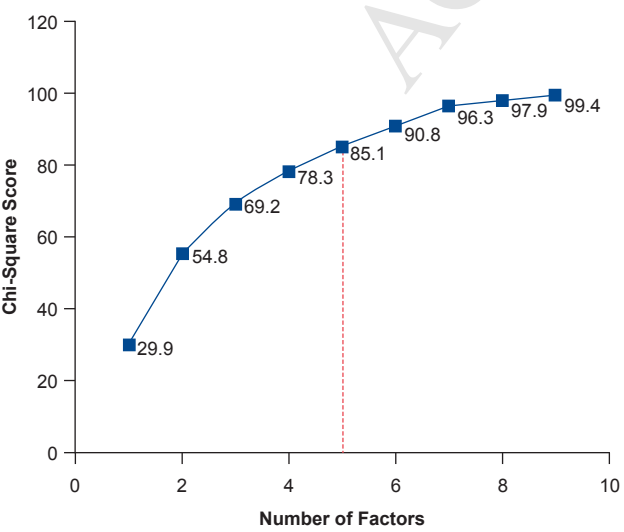

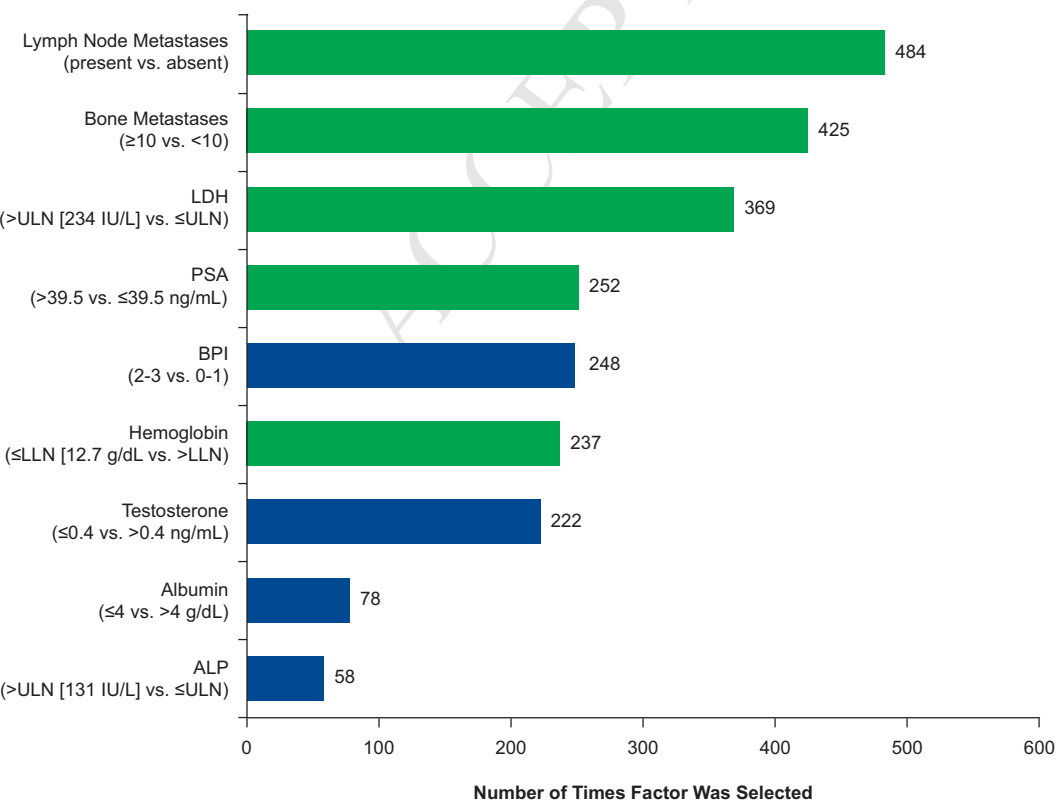

Supplement: NIHMS918641-supplement-supplement_1.pdf [file NIHMS918641-supplement-supplement_1.pdf]
